# Supplementary material for: PRDAGE: a prescription recommendation framework for traditional Chinese medicine based on data augmentation and multi-graph embedding
Source: PeerJ journal article supplement (doi:10.7717/peerj-cs.2974), 2025-08-06
Supplement: Code_and_data.zip [file Code_and_data.zip]

## Sheet: Sheet1
k	Precision	Recall	F1_score
1	0.890475	0.216586	0.348426
2	0.847134	0.379383	0.524067
3	0.802162	0.507655	0.621799
4	0.754436	0.605981	0.672109
5	0.70259	0.677483	0.689808
6	0.654191	0.733117	0.691409
7	0.608753	0.775535	0.682097
8	0.56626	0.808535	0.66605
9	0.527749	0.834116	0.646472
10	0.489619	0.851157	0.621644
11	0.456047	0.865465	0.597335
12	0.425658	0.876403	0.573011
13	0.398328	0.884348	0.549258
14	0.374392	0.892068	0.527428
15	0.3529	0.898463	0.506755
16	0.333788	0.904347	0.487605
17	0.316637	0.909637	0.469756
18	0.301176	0.914427	0.453114
19	0.28686	0.918112	0.437138
20	0.273914	0.921559	0.422306
